# Supplementary material for: Reversal of the Inflammatory Responses in Fabry Patient iPSC-Derived Cardiovascular Endothelial Cells by CRISPR/Cas9-Corrected Mutation
Source: MDPI journal article supplement (doi:10.3390/ijms22052381), 2021-02-27
Supplement: s1 [file s1]

*Supplementary Figure and Table*

**Supple Figure 1.**

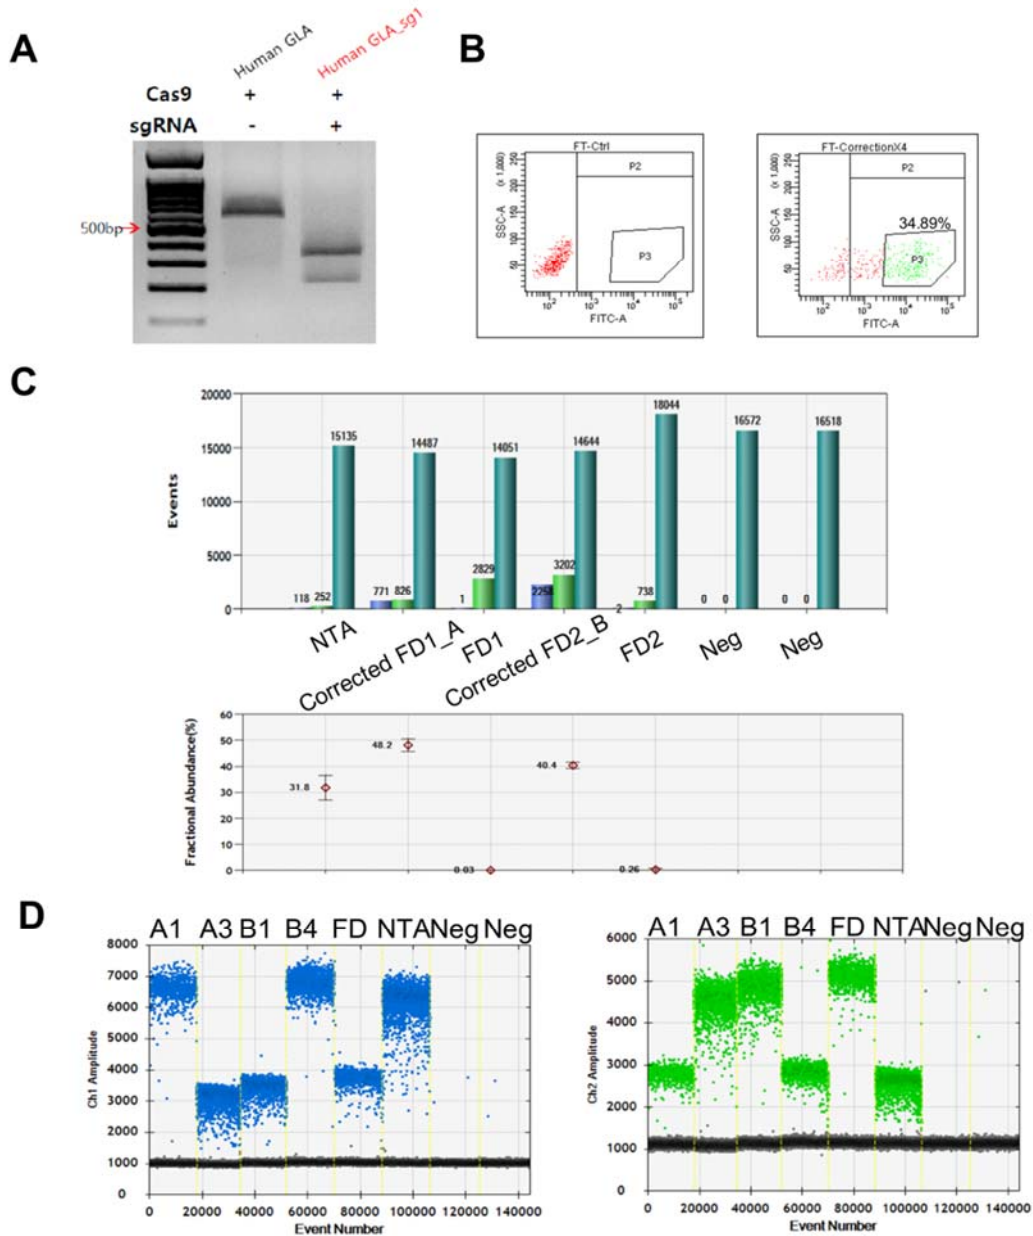

**Supplementary Figure 1.** (A) Genomic DNA of PX458-gRNA transfected HEK293T cells was extracted and the region spanning the gRNA target sites was PCR amplified using on-target primer pairs (arrows), giving PCR products of 544 bp (uncut) and 211 and 333 bp (cut). (B) Quantification of activity of targeted CRISPR/Cas9 using flow cytometry analysis. (C) Quantification of corrected and mutant cell number by ddPCR detection assay. (D)

(D) ddPCR analysis of selected clones from corrected FD pools A and B.

## Supple Figure 2.

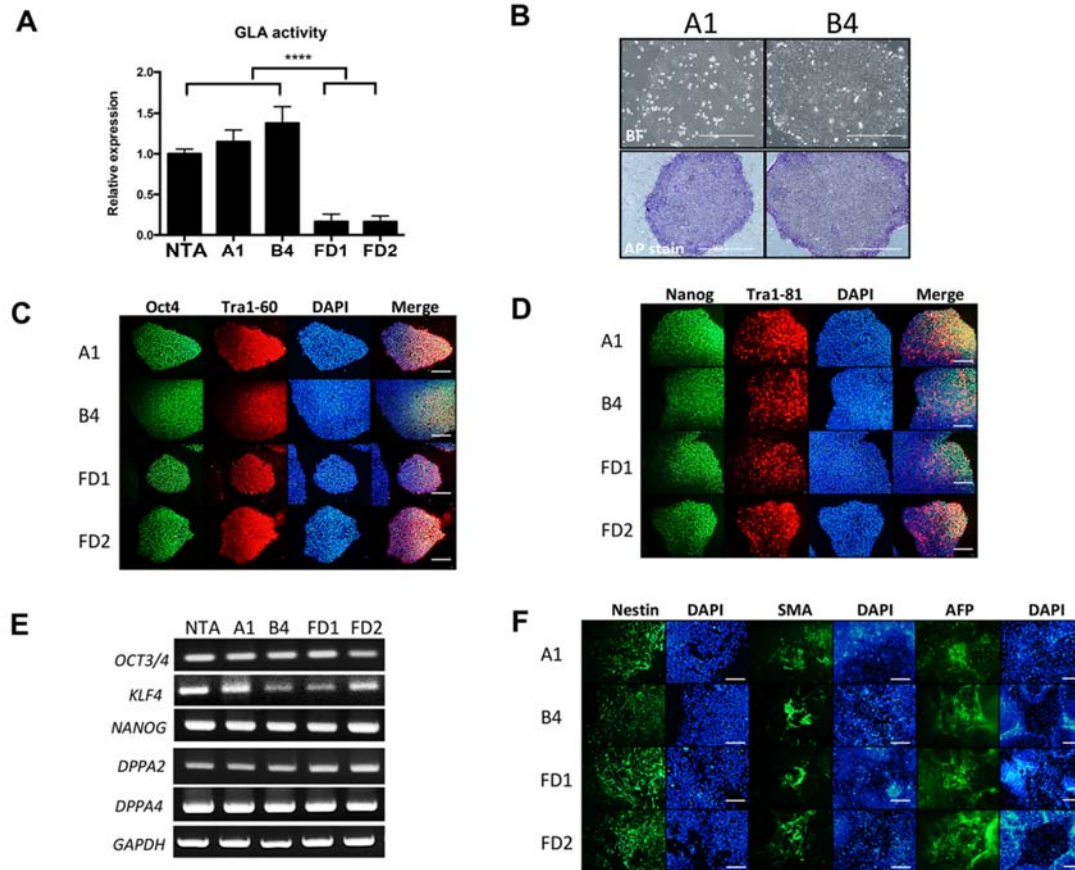

**Supplementary Figure 2.** (A) GLA enzyme activity of isogenic Ctrl rescued from FD-iPSCs, which were compared to NTA, normal hiPSCs Ctrl. (B) Morphology and alkaline phosphatase activity of isogenic Ctrl-iPSCs. The scale bar is 100  $\mu$ m. (C, D) Immunofluorescence analysis demonstrated the protein expression of pluripotency markers [(C) NANOG, Octamer-binding transcription factor 4 (OCT4), TRA-1-60, (D) Nanog and TRA-1-81] in isogenic Ctrl-iPSCs sublines (B1 and A4). Nuclei were counterstained with DAPI staining. The scale bars is 100  $\mu$ m. (E) Reverse transcription polymerase chain reaction (RT-PCR) analysis indicated the expression pattern of embryonic stem cell-like genes in isogenic Ctrl-iPSC lines. NTA is normal hiPSCs from a health donor serving as a positive control. (F) *In vitro* three-layer differentiation of isogenic Ctrl-iPSCs in specific culture media resulted in subpopulations of cells that were immunoreactive for mesodermal smooth muscle actin (SMA), ectodermal Nestin, and endodermal  $\alpha$ -fetoprotein (AFP). The scale bars is 100  $\mu$ m. FD1, FD-iPSC1; FD2, FD-iPSC2; n = 4 images from 4 biological replicates.

## Supple Figure 3.

**A**

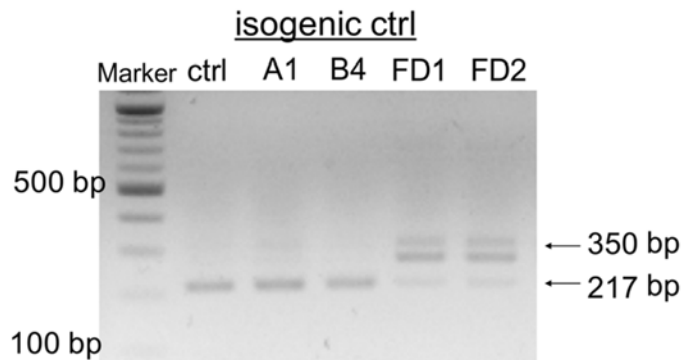

**B**

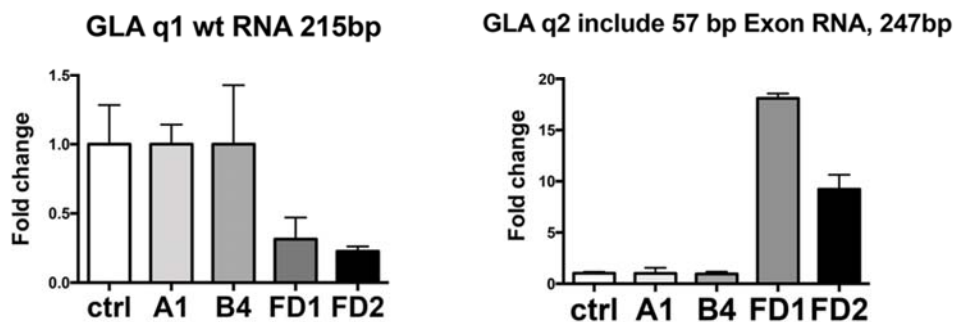

**Supplementary Figure 3.** (A) cDNA from isogenic ctrl and FD-ECs validated the different genotypes. Marker represents the 100-bp DNA ladder. HUVECs served as control (ctrl). (B) RT-PCR with specific primers (GLAqF, GLAq1R for q1 (wild type RNA) and GLAq2R for q2 (include 57bp exon RNA)) for different *GLA* splicing forms in different genotype cells.

## Supple Figure 4.

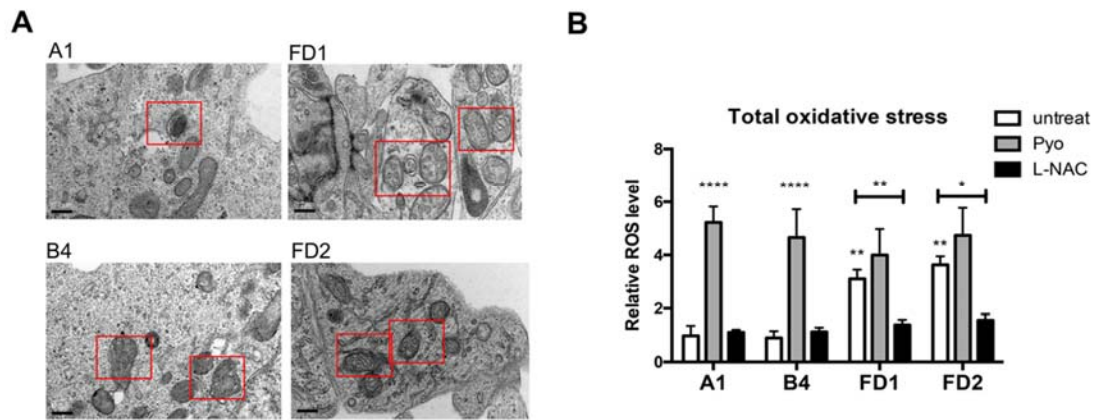

**Supplementary Figure 4.** (A) Transmission electron microscopy (TEM) of isogenic ctrl and FD-ECs revealed significant accumulation of intracytoplasmic vacuoles which contain the round, fragmented mitochondria (red area). The scale bar is 0.2  $\mu\text{m}$ . (n = 3 images from 3 biological replicates). (B) isogenic ctrl-ECs displayed the reversal of the increased ROS in FD-ECs, as measured using DCFDA. Data represented as mean  $\pm$ SD, n=3. Statistical significance of the observed changes was assessed with t-test \*p < 0.05; \*\*\*p < 0.005; \*\*\*\*p < 0.001. ROS inducer is Pyocyanin, Pyo; ROS inhibitor is N-acetyl-L-cysteine, L-NAC.

## Supplemental Table 1. Summary of Healthy Controls and Patients' cell lines Used in this study.

| Cells name     | Age When Sample taken(Years) | GLA Genotype | Status                           | Sample Type            | Isogenic control cell line |
|----------------|------------------------------|--------------|----------------------------------|------------------------|----------------------------|
| HUVECs         | -                            | Normal       | Normal                           | -                      | -                          |
| NTA            | 38                           | Normal       | Normal                           | Blood sample           | -                          |
| Isogenic ctrl1 | -                            | Normal       | Normal                           | Non-viral transfection | FD1                        |
| Isogenic ctrl2 | -                            | Normal       | Normal                           | Non-viral transfection | FD2                        |
| FD1            | 56                           | IVS4+919G>A  | Cardiac variant of Fabry disease | Skin biopsy            | -                          |
| FD2            | 48                           | IVS4+919G>A  | Cardiac variant of Fabry disease | Blood sample           | -                          |

## Supplemental Table 2. Sequences of the primers used for Probe, RT-PCR, and qPCR

| Name            | Sequence                                                                             | Predicted size |
|-----------------|--------------------------------------------------------------------------------------|----------------|
| sqRNA-GLA       | F_TAGGCAGGTGGGATATCAGG<br>R_TTGCACTTGGAAATGAAACCA                                    | 544            |
| ddPCR           | F_CACACTATTTGGAAGTATTTG<br>R_GAGAGATACAGTCAAAGTC                                     | 200            |
| ddPCR Probe     | 5'-TGTCTCCCCACTAGAGTGTAAGTTTC-3'                                                     |                |
| <i>GLA</i> 217  | F_GTCCTTGGCCCTGAATAG<br>R_GTCCAGCAACATCAACAATT                                       | 217            |
| <i>GLA</i> qPCR | F_TTGATACTACGACATTGATGCC<br>q1R_GTATAATTGGGCTTTTGAAAGG<br>q2R_TAGTGGGGAGACATGGTAACAA | 200            |
| <i>KLF4</i>     | F_ATGCTCACCCACCTTCTTC<br>R_TTCTCACCTGTGTGGGTTTCG                                     | 200            |
| <i>Ctgf</i>     | F_GGACCACATCTACGCTGACA<br>R_TTGACTGTGATCGGCTTCCC                                     | 184            |
| <i>GAPDH</i>    | F_AGAAGGCTGGGGCTCATTTG<br>R_AGGGGCCATCCACAGTCTTC                                     | 258            |
| <i>NANOG</i>    | F_CGTAAGCAGAAGAGGATCACC<br>R_GCTTCCTCCACCCACTTCTGC                                   | 179            |
| <i>PECAMI</i>   | F_AGGTCAGCAGCATCGTGGTCAACAT<br>R_GTGGGGTTGTCTTTGAATACCGCAG                           | 187            |
| <i>KDR</i>      | F_TGCAAGGACCAAGGAGACTATGT<br>R_TAGGATGATGACAAGAAGTAGCC                               | 458            |
| <i>vWF</i>      | F_GTTCGTCCTGGAAGGATCGG<br>R_CACTGACACCGTAGTGAGAC                                     | 168            |
| <i>CCL2</i>     | F_GATCTCAGTGCAGAGGCTCG<br>R_TGCTTGTCCAGGTGGTCCAT                                     | 152            |
| <i>CCL5</i>     | F_GCTGTCATCCTCATTGCTACTG<br>R_TGGTGTAGAAATACTCCTTGATGTG                              | 129            |
| <i>CXCL1</i>    | F_GAAAGCTTGCCTCAATCCTG<br>R_CTTCTCCTCCCTTCTGGTC                                      | 97             |
| <i>CXCL10</i>   | F_TGCCATTCTGATTTGCTGCC<br>R_TGCAGGTACAGCGTACAGTT                                     | 192            |
| <i>ICAM1</i>    | F_GGCCGGCCAGCTTATACAC                                                                | 159            |

|            |                                                      |     |
|------------|------------------------------------------------------|-----|
|            | R_TAGACACTTGAGCTCGGGCA                               |     |
| <i>IL6</i> | F_AACCTGAACCTTCCAAAGATGG<br>R_TCTGGCTTGTTCCCTCACTACT | 159 |
| <i>IL8</i> | F_TTTTGCCAAGGAGTGCTAAAGA<br>R_AACCCTCTGCACCCAGTTTTTC | 194 |
| <i>MIF</i> | F_CGCAGAACCGCTCCTACAG<br>R_GGAGTTGTTCCAGCCCACAT      | 105 |

**Supplementary Table 3. Antibodies used in this study.**

| <b>Target</b>                | <b>Source</b>             | <b>Catalog number</b> |
|------------------------------|---------------------------|-----------------------|
| GLA                          | GeneTex                   | GTX101178             |
| Nanog                        | Cell Signaling Technology | #4903                 |
| Oct4                         | Cell Signaling Technology | #2750                 |
| Tra1-81                      | abcam                     | Ab16289               |
| Tra1-60                      | abcam                     | Ab16288               |
| Nestin                       | Cell Signaling Technology | #4760                 |
| SMA                          | Cell Signaling Technology | #19245                |
| AFP                          | Cell Signaling Technology | #4448                 |
| Cd31_FITC                    | abcam                     | Ab33858               |
| VE-cadherin                  | Santa cruz Biotechnology  | Sc-6458               |
| Cd31/PECAM1                  | Santa cruz Biotechnology  | Sc-71872              |
| Gb3/CD77                     | abcam                     | Ab19795               |
| LC3                          | Novus Biologicals         | NB100-200             |
| P62                          | Novus Biologicals         | NBP1-48320            |
| VCAM1                        | Cell Signaling Technology | #13662                |
| GAPDH                        | Cell Signaling Technology | #2118                 |
| CD54/ICAM1                   | Cell Signaling Technology | #4915                 |
| NF-kB p65                    | Cell Signaling Technology | #8242                 |
| Ikk $\alpha$                 | Cell Signaling Technology | #2682                 |
| IKK $\beta$                  | Cell Signaling Technology | #2678                 |
| p-Ikk $\alpha$ / IKK $\beta$ | Cell Signaling Technology | #2697                 |
| ERK                          | Cell Signaling Technology | #4695                 |
| p-ERK                        | Cell Signaling Technology | #4370                 |
| AKT                          | Santa cruz Biotechnology  | SC-5298               |

|       |                           |          |
|-------|---------------------------|----------|
| p-AKT | Santa cruz Biotechnology  | SC-52940 |
| p38   | Cell Signaling Technology | #9212    |
| p-p38 | Cell Signaling Technology | #4511    |
